# Supplementary material for: Dynamic evolution of high-temperature molten salt electrolysis of titanium under different operational conditions
Source: Royal Society of Chemistry journal article supplement (doi:10.1039/d2qi02192g), 2022-12-01
Supplement: d2qi02192g3.pdf [file d2qi02192g3.pdf]

**Supplementary Information (Inorganic Chemistry Frontiers)**

**Dynamic evolution of high-temperature molten salt electrolysis of titanium  
under different operational conditions**

Handong Jiao<sup>a</sup>, Mengjun Liu<sup>a</sup>, Yang Gao<sup>b</sup>, Jianxun Song<sup>c,\*</sup>, Shuqiang Jiao<sup>b,\*</sup>

<sup>a</sup>Institute of Advanced Structure Technology, Beijing Institute of Technology, Beijing  
100081, P R China

<sup>b</sup>State Key Laboratory of Advanced Metallurgy, University of Science and  
Technology Beijing, Beijing, 100083, P R China

<sup>c</sup>Zhongyuan Critical Metals Laboratory, Zhengzhou University, Zhengzhou  
University, Zhengzhou 450001, P R China

Email: sjiao@ustb.edu.cn (S. Jiao); jianxun.song@zzu.edu.cn (J. Song)

**Keywords:** Molten salt electrochemistry, X-ray computer microtomography,  
Titanium electrolysis, Pulse electrolysis, Concentration polarization

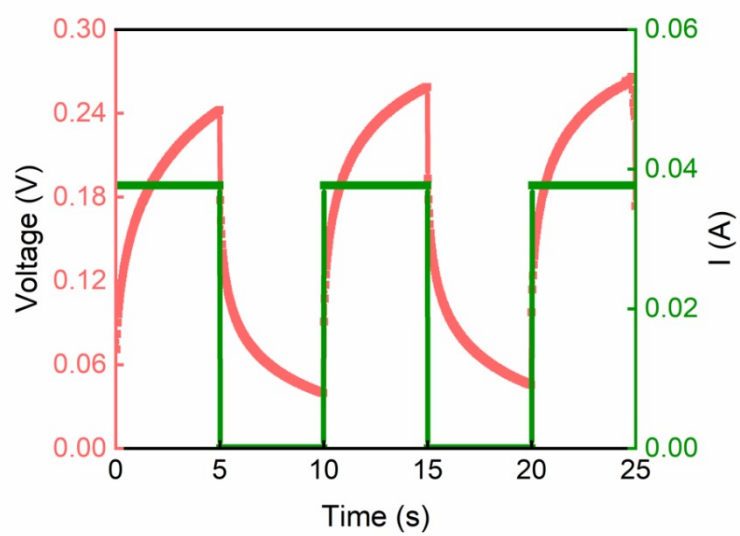

**Fig. S1.** The voltage and current profiles of pulse electrolysis

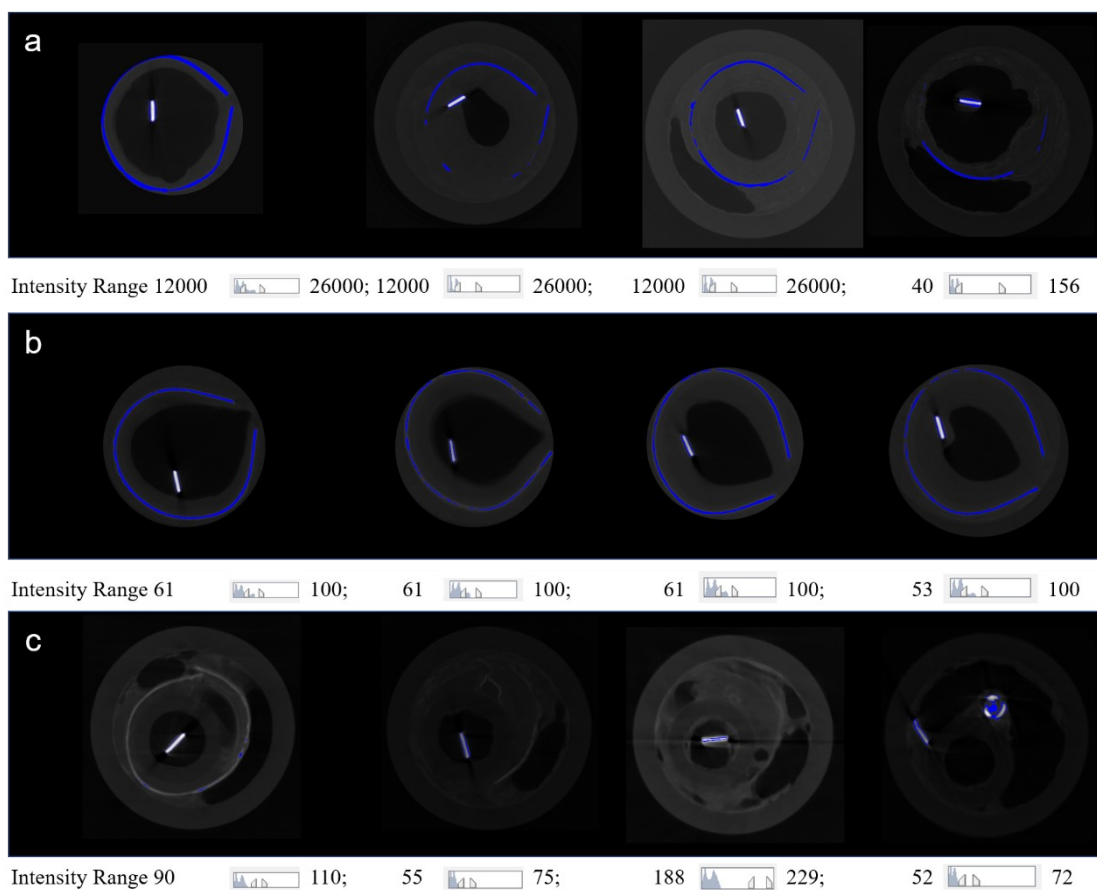

**Fig. S2.** The specific value of threshold segmentation in avizo software. Threshold segmentation value of titanium coating under (a) pulse electrolysis at  $0.3\text{A cm}^{-2}$  current density, (b) direct current (DC) electrolysis at  $0.3\text{A cm}^{-2}$  current density, and (c) pulse electrolysis at  $0.1\text{A cm}^{-2}$  current density.

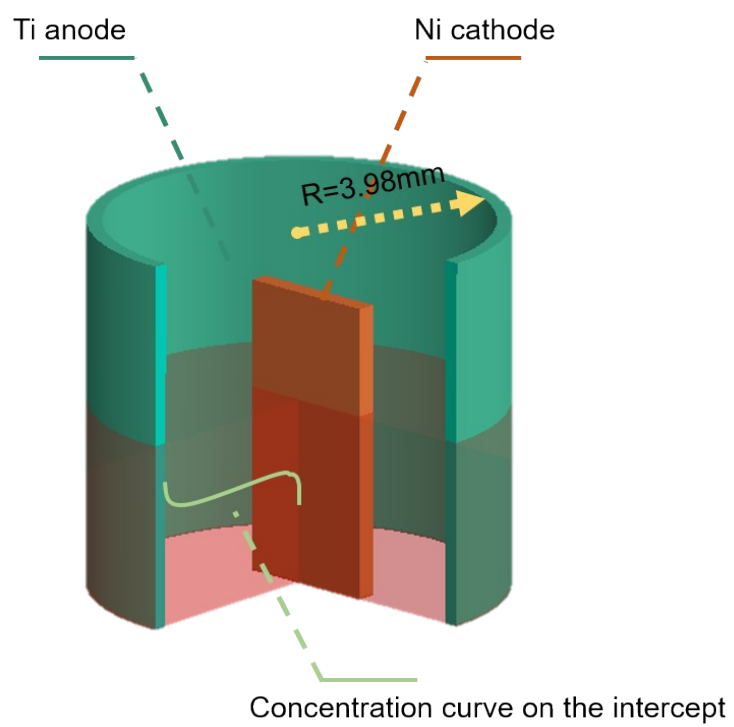

**Fig. S3.** Schematic diagram of electrolysis system.

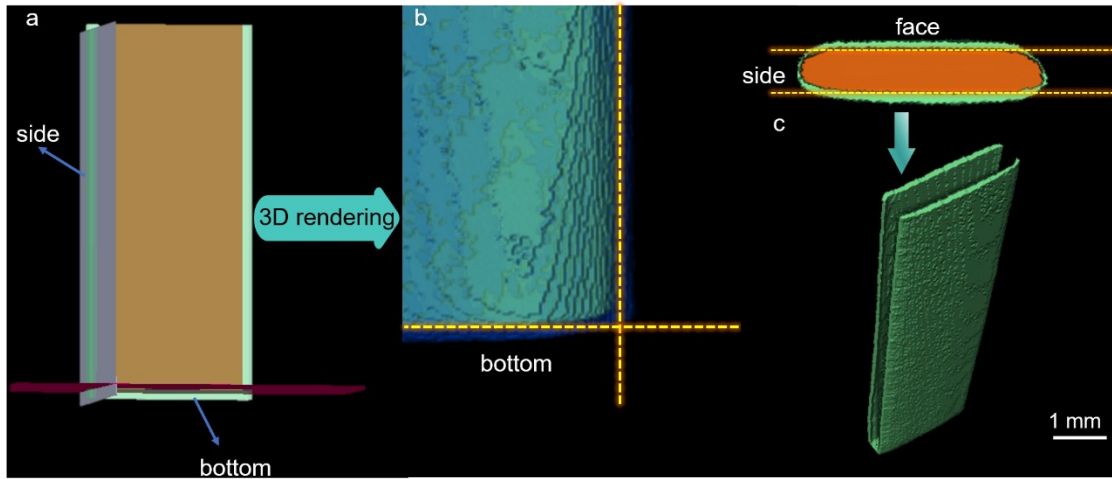

**Fig. S4.** (a) Schematic diagram of the segmentation of the cathode part; (b) 3D rendering of the cathode segmentation; (c) Titanium coating obtained by division.

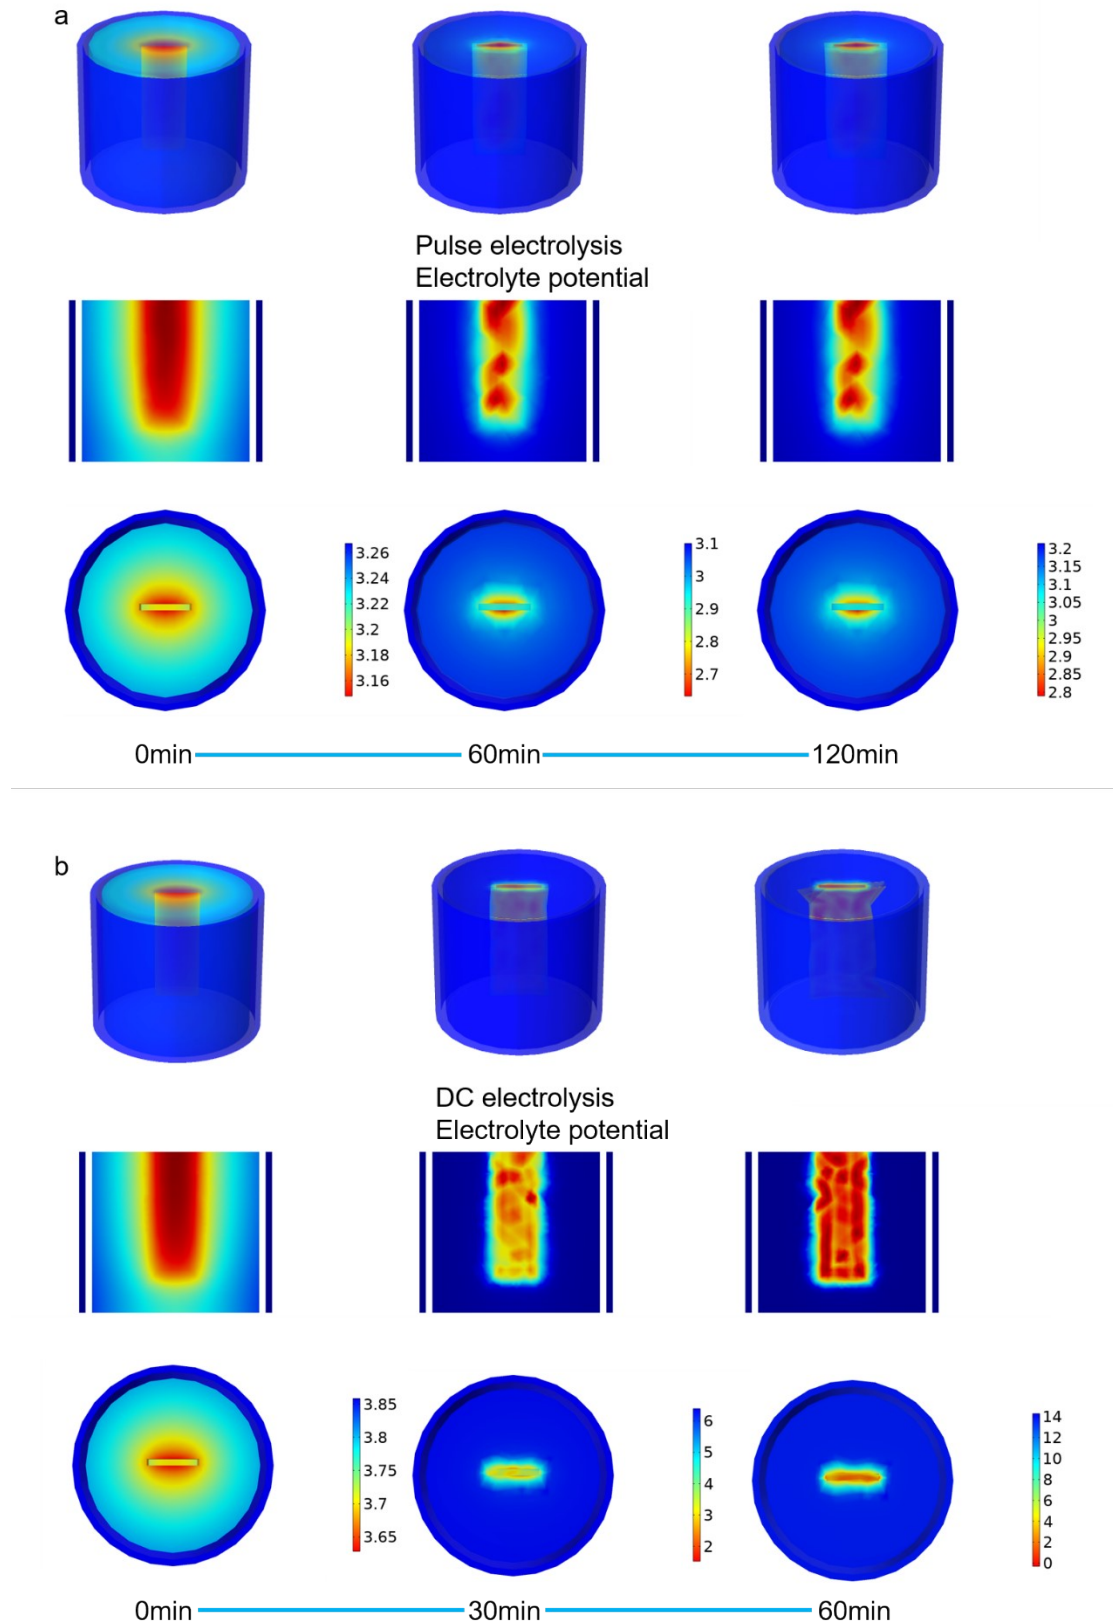

**Fig. S4.** (a) Electrolyte potential distribution of pulsed electrolysis under simulation;

(b) Electrolyte potential distribution of DC electrolysis under simulation

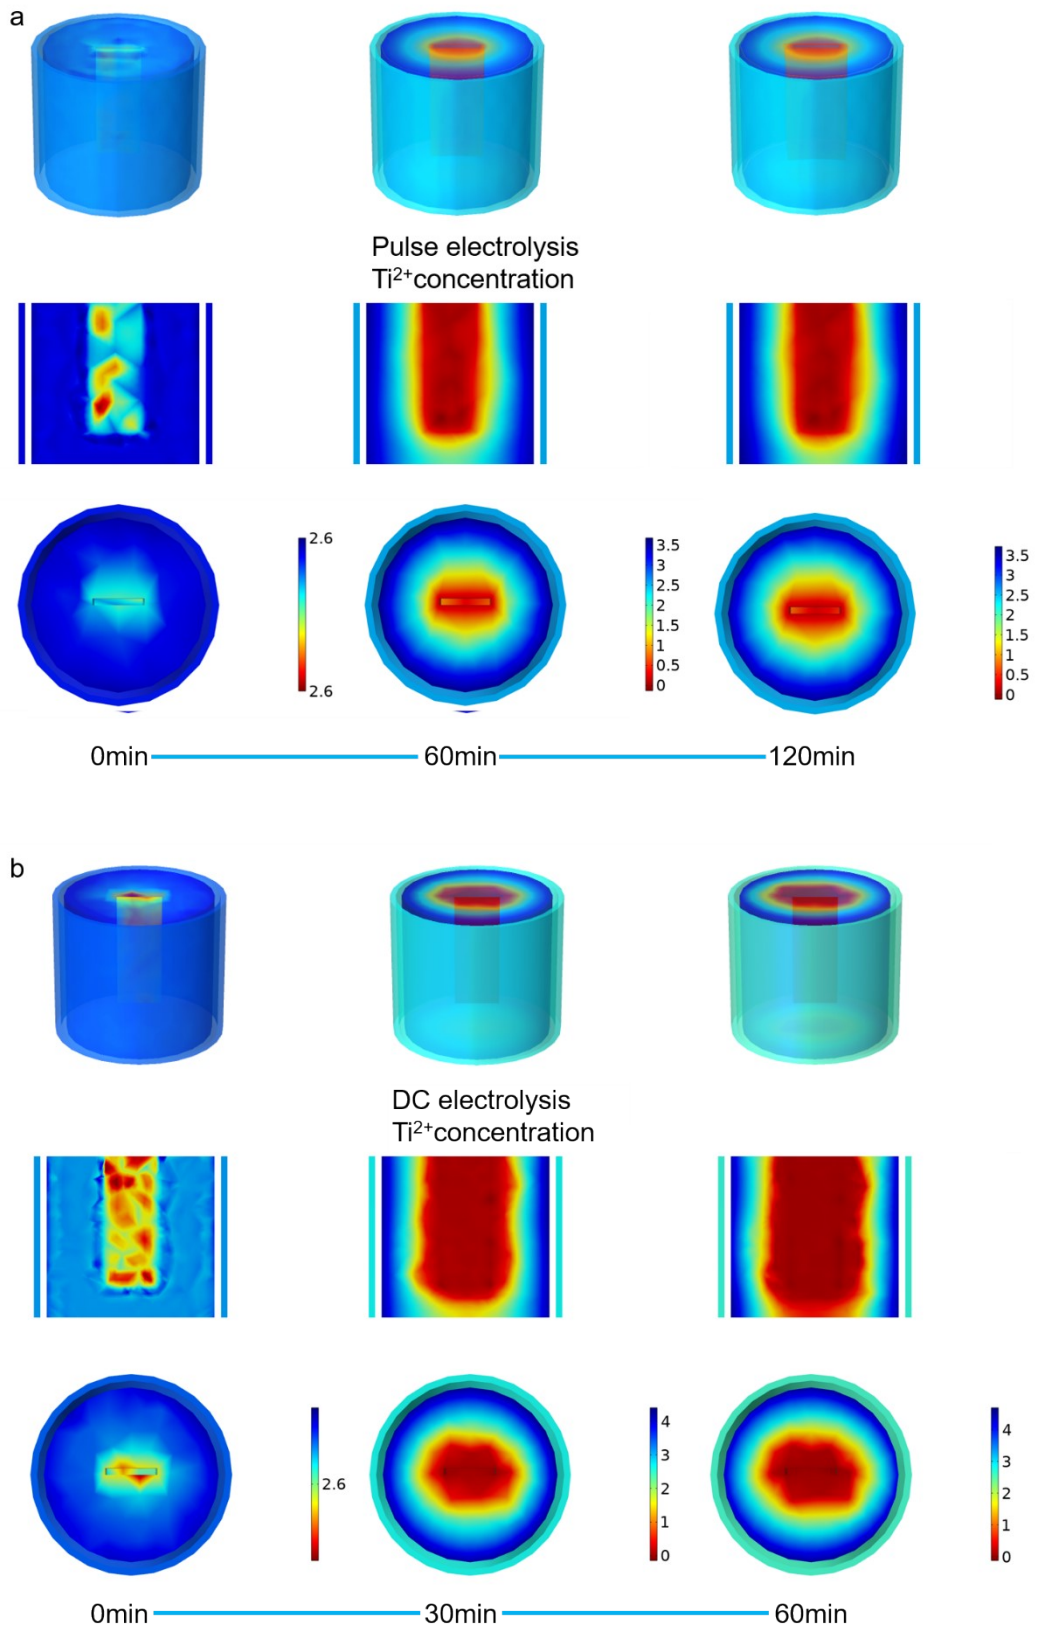

**Fig. S5.** (a) Ti<sup>2+</sup> concentration distribution of pulsed electrolysis obtained by simulation; (b) Ti<sup>2+</sup> concentration distribution of DC electrolysis obtained by simulation.

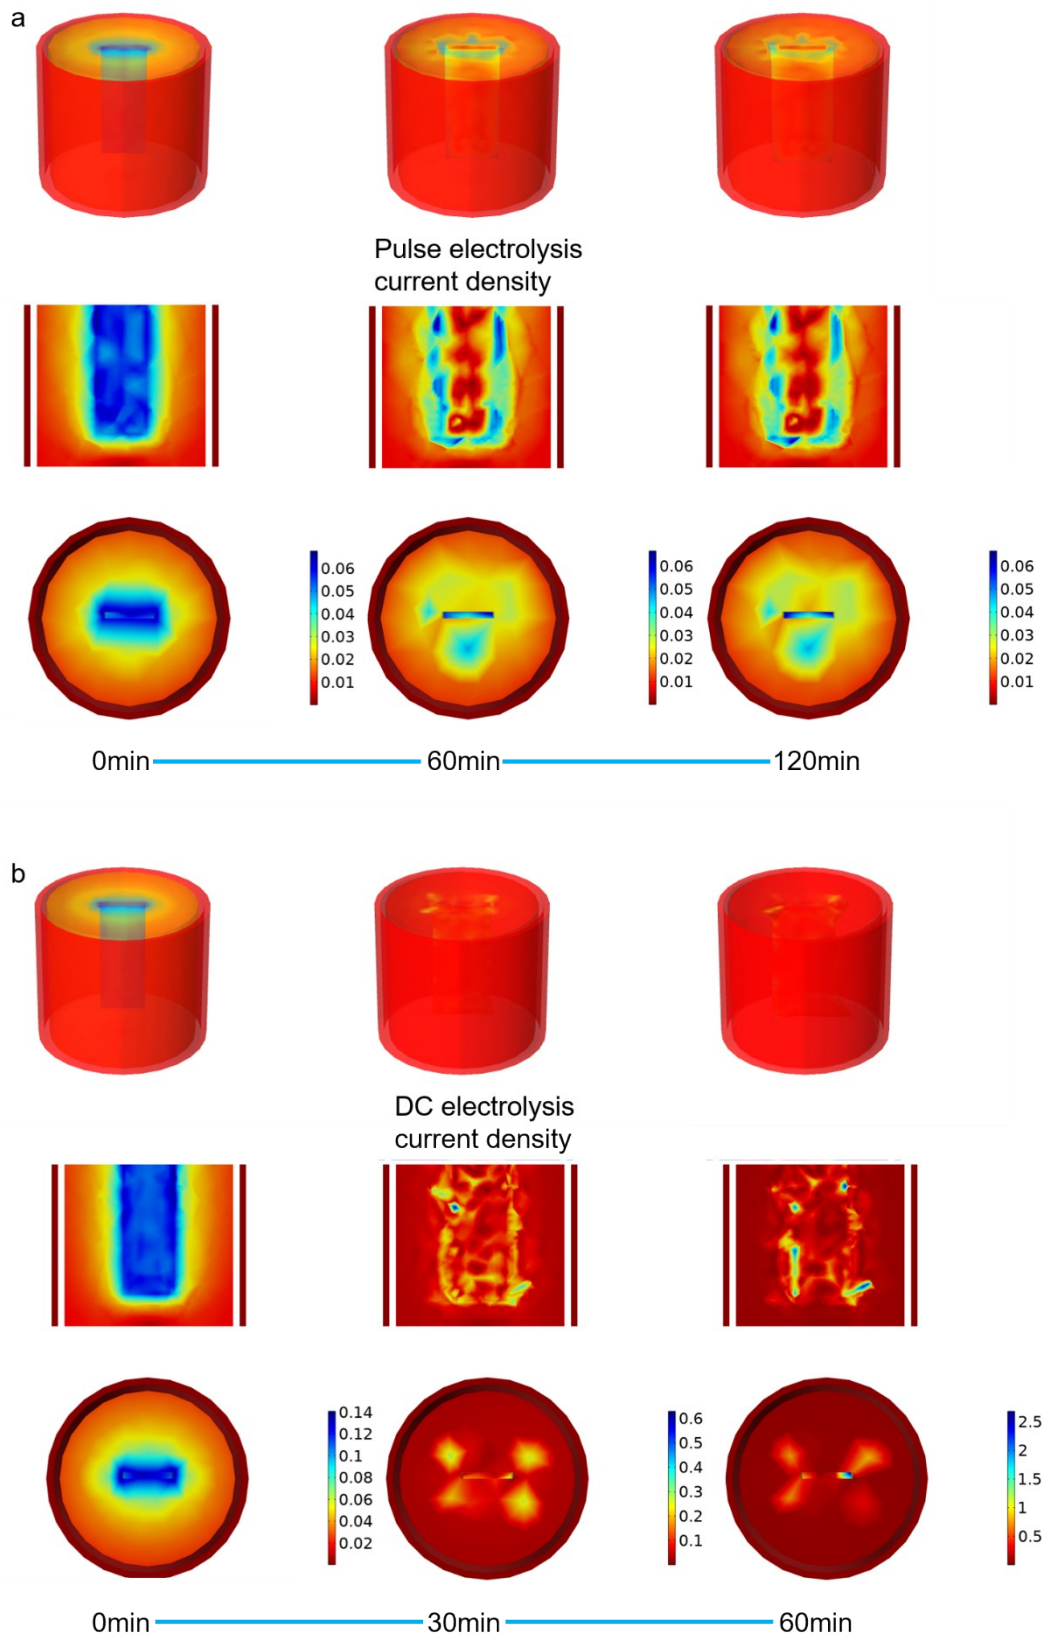

**Fig. S6.** (a) Current density distribution of pulsed electrolysis under simulation; (b) Current density distribution of DC electrolysis under simulation.



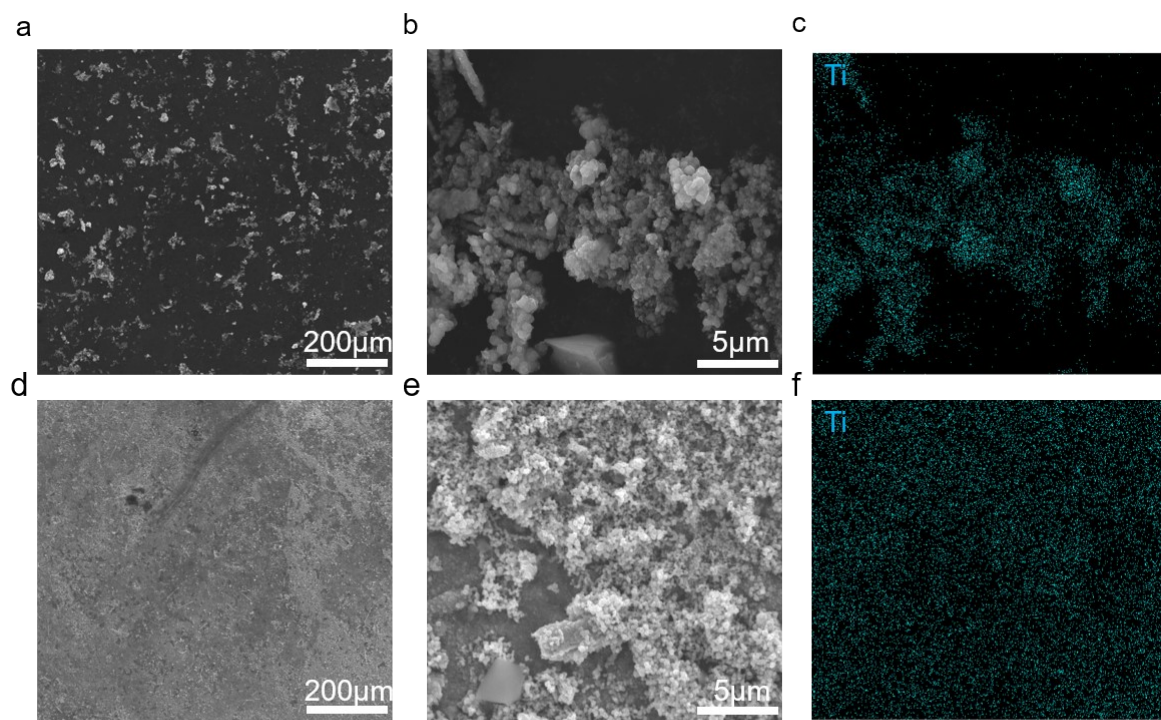

**Fig. S7.** (a) SEM picture of cathode under pulse electrolysis; (b) SEM picture of cathode under pulse electrolysis; (c) EDS mapping of cathode under pulse electrolysis; (d) SEM picture of cathode under DC electrolysis; (e) SEM picture of cathode under DC electrolysis; (f) EDS mapping of cathode under DC electrolysis.

**Movie S1.** Variation of titanium ions concentration under pulse electrolysis.

**Movie S2.** Variation of titanium ions concentration under DC electrolysis.
